# Supplementary material for: Occupational risk factors for meniscal lesions: a systematic review and meta-analysis
Source: Springer Nature journal article supplement (doi:10.1186/s12891-021-04900-7), 2021-12-15
Supplement: MOESM1 [file 19962778]

## Additional file 1: Search strategy

### 1. Medline (via Ovid): 28.02.2020

|     |                                                                                                                                                                                                                                                                                                                                                                                                                                                                                                                                                                                                                                                                                                                                                                                                                                                                                                                                                                                                                             |
|-----|-----------------------------------------------------------------------------------------------------------------------------------------------------------------------------------------------------------------------------------------------------------------------------------------------------------------------------------------------------------------------------------------------------------------------------------------------------------------------------------------------------------------------------------------------------------------------------------------------------------------------------------------------------------------------------------------------------------------------------------------------------------------------------------------------------------------------------------------------------------------------------------------------------------------------------------------------------------------------------------------------------------------------------|
| #1  | Work/ or workplace/ or workload/ or employment/ or occupations/ or occupational diseases/ or occupational exposure/ or occupational medicine/ or (work* or employ* or occupation* or job* or industr*).ti,ab.                                                                                                                                                                                                                                                                                                                                                                                                                                                                                                                                                                                                                                                                                                                                                                                                               |
| #2  | Lifting/ or (lifting or kneeling or carrying or climbing or squatting or crawling or stooping or ((running or moving or walking or jumping) adj2 ((hard or uneven or rough or bumpy or slippery) adj2 (surface* or ground* or terrain*))) or (knee adj (buckling or shifting or slipping)) or (shear* adj (stress* or force* or motion*)) or pivoting or twisting).ti,ab.                                                                                                                                                                                                                                                                                                                                                                                                                                                                                                                                                                                                                                                   |
| #3  | Mining/ or coal mining/ or gardening/ or agriculture/ or (mining or construction or tiling or shunting or paving or roofing or gardening or farming).ti,ab.                                                                                                                                                                                                                                                                                                                                                                                                                                                                                                                                                                                                                                                                                                                                                                                                                                                                 |
| #4  | Miners/ or farmers/ or (miner* or farmer* or ((blue-collar or factory or coal-face or construction or road or concrete or shipyard or metal or asphalt) adj (worker* or laborer* or labourer*)) or ((floor or carpet or parquet or pipe) adj (layer* or fitter*)) or pipefitter* or woodworker* or tiler* or tile setter* or ((stove or oven) adj (maker* or builder* or fitter* or manufacturer*)) or shunter* or screed installer* or baggage handler* or bricklayer* or mason* or builder* or paver* or roofer* or slater* or painter* or decorator* or ((electrical or television or computer) adj engineer*) or cleaner* or laborer* or labourer* or childcare or joiner* or carpenter* or motor mechanic* or maintenance fitter* or installer* or welder* or shipbuilder* or docker* or gardener* or millwright* or fitter* or boilermaker* or landscaper* or plumber* or waitress* or waiter* or fisherm*n or seam*n or sailor* or electrician* or (professional adj (sportsm*n or sportswom*n or athlete*))).ti,ab. |
| #5  | #1 or #2 or #3 or #4                                                                                                                                                                                                                                                                                                                                                                                                                                                                                                                                                                                                                                                                                                                                                                                                                                                                                                                                                                                                        |
| #6  | exp meniscus/ or tibial meniscus injuries/ or menisc*.ti,ab.                                                                                                                                                                                                                                                                                                                                                                                                                                                                                                                                                                                                                                                                                                                                                                                                                                                                                                                                                                |
| #7  | Knee/ and (Magnetic resonance imaging/ or arthroscopy/ or "International Classification of Diseases"/ or self report/ or (mri or magnetic resonance imag* or arthroscop* or (clinical adj (test* or examination*)) or self-report*).ti,ab.)                                                                                                                                                                                                                                                                                                                                                                                                                                                                                                                                                                                                                                                                                                                                                                                 |
| #8  | Meniscectomy/ or knee injuries/ or (knee adj2 (pain or complaint* or injur* or disorder* or symptom*)).ti,ab.                                                                                                                                                                                                                                                                                                                                                                                                                                                                                                                                                                                                                                                                                                                                                                                                                                                                                                               |
| #9  | #6 or #7 or #8                                                                                                                                                                                                                                                                                                                                                                                                                                                                                                                                                                                                                                                                                                                                                                                                                                                                                                                                                                                                              |
| #10 | #5 and #9                                                                                                                                                                                                                                                                                                                                                                                                                                                                                                                                                                                                                                                                                                                                                                                                                                                                                                                                                                                                                   |

### 2. Embase (via Elsevier): 28.02.2020

|    |                                                                                                                                                                                                                                                                                                                                                                                                                                                                                            |
|----|--------------------------------------------------------------------------------------------------------------------------------------------------------------------------------------------------------------------------------------------------------------------------------------------------------------------------------------------------------------------------------------------------------------------------------------------------------------------------------------------|
| #1 | Work/de or workplace/de or workload/de or employment/de or occupation/de or "occupational disease"/de or "occupational exposure"/de or "occupational hazard"/de or "occupational medicine"/de or "work environment"/de or "occupational health"/de or (occupation* or "work-related" or "working environment" or "work environment" or "work place*" or workplace* or "work site*" or worksite* or "work load" or workload or "at work" or worke* or job* or employment or industry):ti,ab |
| #2 | "weight lifting"/de or "weight bearing"/de or "stair climbing"/de or "shear stress"/de or (lifting or carrying or kneeling or squatting or climbing or crawling or stooping or                                                                                                                                                                                                                                                                                                             |

|     |                                                                                                                                                                                                                                                                                                                                                                                                                                                                                                                                                                                                                                                                                                                                                                                                                                                                                                                                                                                                                                                                                                                                                                                                                                                                                                                |
|-----|----------------------------------------------------------------------------------------------------------------------------------------------------------------------------------------------------------------------------------------------------------------------------------------------------------------------------------------------------------------------------------------------------------------------------------------------------------------------------------------------------------------------------------------------------------------------------------------------------------------------------------------------------------------------------------------------------------------------------------------------------------------------------------------------------------------------------------------------------------------------------------------------------------------------------------------------------------------------------------------------------------------------------------------------------------------------------------------------------------------------------------------------------------------------------------------------------------------------------------------------------------------------------------------------------------------|
|     | pivoting or twisting):ti,ab or (((running or moving or walking or jumping) near/2 (hard or uneven or rough or bumpy or slippery) near/2 (surface* or ground* or terrain*)):ti,ab or (knee near/1 (buckling or shifting or slipping)):ti,ab or ((shear* near/1 (stress* or force* or motion*)):ti,ab                                                                                                                                                                                                                                                                                                                                                                                                                                                                                                                                                                                                                                                                                                                                                                                                                                                                                                                                                                                                            |
| #3  | Mining/de or “coal mining”/de or gardening/de or agriculture/de or (mining or construction or tiling or shunting or paving or roofing or gardening or farming):ti,ab                                                                                                                                                                                                                                                                                                                                                                                                                                                                                                                                                                                                                                                                                                                                                                                                                                                                                                                                                                                                                                                                                                                                           |
| #4  | Miner/de or “agricultural worker”/de or “blue collar worker”/de or “construction worker”/de or “shipyard worker”/de or painter/de or carpenter/de or gardener/de or fisherman/de or sailor/de or electrician/de or “professional athlete”/de or (miner* or farmer* or tiler* or “tile setter*” or shunter* or “screed installer*” or “baggage handler*” or cleaner* or pipefitter* or woodworker* or labourer* or laborer* or bricklayer* or mason* or builder* or paver* or roofer* or slater* or painter* or decorator* or childcare or joiner* or carpenter* or “motor mechanic*” or “maintenance fitter*” or installer* or welder* or shipbuilder* or docker* or gardener* or millwright* or fitter* or boilermaker* or landscaper* or plumber* or waitress* or waiter* or fisherm*n or seam*n or sailor* or electrician*):ti,ab or ((“blue-collar” or factory or “coal-face” or construction or road or concrete or shipyard or asphalt or metal) near/1 (worker* or labourer* or laborer*)):ti,ab or ((floor or carpet or parquet or pipe) near/1 (layer* or fitter*)):ti,ab or ((stove or oven) near/1 (maker* or builder* or fitter* or manufacturer*)):ti,ab or ((electrical or television or computer) near/1 engineer*):ti,ab or (professional near/1 (sportsm*n or sportswom*n or athlete*)):ti,ab |
| #5  | #1 or #2 or #3 or #4                                                                                                                                                                                                                                                                                                                                                                                                                                                                                                                                                                                                                                                                                                                                                                                                                                                                                                                                                                                                                                                                                                                                                                                                                                                                                           |
| #6  | „knee meniscus“/de or „knee meniscus rupture“/de or menisc*:ti,ab                                                                                                                                                                                                                                                                                                                                                                                                                                                                                                                                                                                                                                                                                                                                                                                                                                                                                                                                                                                                                                                                                                                                                                                                                                              |
| #7  | Knee/de and ((“nuclear magnetic resonance imaging”/de or “international classification of diseases”/de or “self report”/de or “knee arthroscopy”/de or “clinical examination”/de) or (mri or “magnetic resonance imag*” or arthroscop* or “self-report*”):ti,ab or (clinical near/1 (test* or examination*)):ti,ab)                                                                                                                                                                                                                                                                                                                                                                                                                                                                                                                                                                                                                                                                                                                                                                                                                                                                                                                                                                                            |
| #8  | Meniscectomy/de or “meniscal repair”/de or “meniscal transplantation”/de or “meniscal surgery”/de or “knee injury”/de or (knee near/2 (pain or complaint* or injur* or disorder* or symptom*)):ti,ab                                                                                                                                                                                                                                                                                                                                                                                                                                                                                                                                                                                                                                                                                                                                                                                                                                                                                                                                                                                                                                                                                                           |
| #9  | #6 or #7 or #8                                                                                                                                                                                                                                                                                                                                                                                                                                                                                                                                                                                                                                                                                                                                                                                                                                                                                                                                                                                                                                                                                                                                                                                                                                                                                                 |
| #10 | #5 and #9                                                                                                                                                                                                                                                                                                                                                                                                                                                                                                                                                                                                                                                                                                                                                                                                                                                                                                                                                                                                                                                                                                                                                                                                                                                                                                      |

### 3. Web of Science: 27.02.2020

|    |                                                                                                                                                                                                                                                                                                                                                                                                                                                                      |
|----|----------------------------------------------------------------------------------------------------------------------------------------------------------------------------------------------------------------------------------------------------------------------------------------------------------------------------------------------------------------------------------------------------------------------------------------------------------------------|
| #1 | TS=(occupation* or “work-related” or “working environment” or “work environment” or workplace* or “work place*” or worksite* or “work site*” or workload or “work load” or “at work” or worke* or job* or employment or industry)<br><i>Indexes=SCI-EXPANDED, SSCI, A&amp;HCI Timespan=All years</i>                                                                                                                                                                 |
| #2 | TS((((lifting or carrying) near/0 (load* or weight*)) or kneeling or climbing or squatting or crawling or stooping or ((running or moving or walking or jumping) near/2 ((hard or uneven or rough or bumpy or slippery) near/2 (surface* or ground* or terrain*))) or (knee near/0 (buckling or shifting or slipping)) or (shear* near/0 (stress* or force* or motion*) or pivoting or twisting))<br><i>Indexes=SCI-EXPANDED, SSCI, A&amp;HCI Timespan=All years</i> |

|     |                                                                                                                                                                                                                                                                                                                                                                                                                                                                                                                                                                                                                                                                                                                                                                                                                                                                                                                                                                                                                                                                                                 |
|-----|-------------------------------------------------------------------------------------------------------------------------------------------------------------------------------------------------------------------------------------------------------------------------------------------------------------------------------------------------------------------------------------------------------------------------------------------------------------------------------------------------------------------------------------------------------------------------------------------------------------------------------------------------------------------------------------------------------------------------------------------------------------------------------------------------------------------------------------------------------------------------------------------------------------------------------------------------------------------------------------------------------------------------------------------------------------------------------------------------|
| #3  | TS=(mining or gardening or construction or tiling or shunting or paving or roofing or farming)<br><i>Indexes=SCI-EXPANDED, SSCI, A&amp;HCI Timespan=All years</i>                                                                                                                                                                                                                                                                                                                                                                                                                                                                                                                                                                                                                                                                                                                                                                                                                                                                                                                               |
| #4  | TS=(miner* or farmer* or ("blue-collar" or factory or "coal-face" or construction or road or concrete or shipyard or metal or asphalt) near/0 (worker* or laborer* or labourer*)) or ((floor or carpet or parquet or pipe) near/0 (layer* or fitter*)) or pipefitter* or woodworker* or tiler* or "tile setter*" or ((stove or oven) near/0 (maker* or builder* or fitter* or manufacturer*)) or shunter* or "screed installer*" or "baggage handler*" or bricklayer* or mason* or builder* or paver* or roofer* or slater* or painter* or decorator* or ((electrical or television or computer) near/0 engineer*) or cleaner* or laborer* or labourer* or childcare or joiner* or carpenter* or "motor mechanic*" or "maintenance fitter*" or installer* or welder* or shipbuilder* or docker* or gardener* or millwright* or fitter* or boilermaker* or landscaper* or plumber* or waitress* or waiter* or fisherm*n or seam*n or sailor* or electrician* or (professional near/0 (sportsm*n or sportswom*n or athlete*)))<br><i>Indexes=SCI-EXPANDED, SSCI, A&amp;HCI Timespan=All years</i> |
| #5  | #4 OR #3 OR #2 OR #1<br><i>Indexes=SCI-EXPANDED, SSCI, A&amp;HCI Timespan=All years</i>                                                                                                                                                                                                                                                                                                                                                                                                                                                                                                                                                                                                                                                                                                                                                                                                                                                                                                                                                                                                         |
| #6  | TS=(menisc*)<br><i>Indexes=SCI-EXPANDED, SSCI, A&amp;HCI Timespan=All years</i>                                                                                                                                                                                                                                                                                                                                                                                                                                                                                                                                                                                                                                                                                                                                                                                                                                                                                                                                                                                                                 |
| #7  | TS=(knee and ("magnetic resonance imag*" or mri or arthroscop* or "self report*" or (clinical near/0 (test* or examination*))))<br><i>Indexes=SCI-EXPANDED, SSCI, A&amp;HCI Timespan=All years</i>                                                                                                                                                                                                                                                                                                                                                                                                                                                                                                                                                                                                                                                                                                                                                                                                                                                                                              |
| #8  | TS=(knee near/2 (pain or complaint* or injur* or disorder* or symptom*))<br><i>Indexes=SCI-EXPANDED, SSCI, A&amp;HCI Timespan=All years</i>                                                                                                                                                                                                                                                                                                                                                                                                                                                                                                                                                                                                                                                                                                                                                                                                                                                                                                                                                     |
| #9  | #8 OR #7 OR #6<br><i>Indexes=SCI-EXPANDED, SSCI, A&amp;HCI Timespan=All years</i>                                                                                                                                                                                                                                                                                                                                                                                                                                                                                                                                                                                                                                                                                                                                                                                                                                                                                                                                                                                                               |
| #10 | #9 AND #5<br><i>Indexes=SCI-EXPANDED, SSCI, A&amp;HCI Timespan=All years</i>                                                                                                                                                                                                                                                                                                                                                                                                                                                                                                                                                                                                                                                                                                                                                                                                                                                                                                                                                                                                                    |
