# Supplementary material for: Occupational risk factors for meniscal lesions: a systematic review and meta-analysis
Source: Springer Nature journal article supplement (doi:10.1186/s12891-021-04900-7), 2021-12-15
Supplement: MOESM2 [file 19962778]

**Additional file 2: Risk of bias schema**

| Major risk of bias domains*                                                                                                                                                                                                                                                                                                                                                                                                                                                                                                                                                                                                                                                                                                                                                                                                                                                                                                                                                                          | Risk | Criteria                                                                                                                                                                                                                                                                                                                                                                                                                                                                                                                       | Hints/ notes |
|------------------------------------------------------------------------------------------------------------------------------------------------------------------------------------------------------------------------------------------------------------------------------------------------------------------------------------------------------------------------------------------------------------------------------------------------------------------------------------------------------------------------------------------------------------------------------------------------------------------------------------------------------------------------------------------------------------------------------------------------------------------------------------------------------------------------------------------------------------------------------------------------------------------------------------------------------------------------------------------------------|------|--------------------------------------------------------------------------------------------------------------------------------------------------------------------------------------------------------------------------------------------------------------------------------------------------------------------------------------------------------------------------------------------------------------------------------------------------------------------------------------------------------------------------------|--------------|
| <p><b>1. Recruitment procedure &amp; follow-up (in cohort studies):</b></p> <p><b>For cohort studies</b></p> <p><i>HINT: We are looking for selection bias:</i></p> <ul style="list-style-type: none"> <li>- Was the cohort representative of a defined population? #</li> <li>- Was everybody included who should have been included? #</li> <li>- If response rate is slightly &lt;50% but does not indicate selection bias, it will be listed as a demerit in extraction table.</li> </ul> <p><i>PRELIMINARY RULING:</i></p> <ul style="list-style-type: none"> <li>- If the cohort recruitment is based on a convenient/ self-reported sampling OR if response is &lt;10% or not reported, the study will be excluded from analysis.</li> </ul>                                                                                                                                                                                                                                                  | low  | <ul style="list-style-type: none"> <li><input type="checkbox"/> Cohort recruitment was acceptable.#</li> <li><input type="checkbox"/> Baseline response is acceptable (50% or more) OR is &lt;50% and &gt;30%, but substantial differential selection could be excluded.</li> <li><input type="checkbox"/> Loss to follow-up is below 20% in total and not different between the two groups (up to 10% difference).*</li> </ul>                                                                                                |              |
|                                                                                                                                                                                                                                                                                                                                                                                                                                                                                                                                                                                                                                                                                                                                                                                                                                                                                                                                                                                                      | high | <ul style="list-style-type: none"> <li><input type="checkbox"/> Cohort recruitment was not acceptable.#</li> <li><input type="checkbox"/> Response not reported/ not calculable.</li> <li><input type="checkbox"/> Total loss to follow-up is larger than acceptable (20% or more)* OR drop out differs between the groups by more than 10%* OR the reasons for drop out considerably differ between exposed and non-exposed groups.*</li> </ul>                                                                               |              |
| <p><b>For case-control studies</b></p> <p><i>HINT: We are looking for selection bias:</i></p> <ul style="list-style-type: none"> <li>- Were the cases and control subjects representative of the same defined population ("study base"; geographically and/or temporally)? #</li> <li>- Was there an established reliable system for selecting all the cases? #</li> <li>- The same exclusion criteria are used for both cases and controls. #</li> <li>- Comparison is made between participants and non-participants to establish their similarities or differences. #</li> <li>- If response rate is slightly &lt;50% but does not indicate selection bias, it will be listed as a demerit in extraction table.</li> </ul> <p><i>PRELIMINARY RULING:</i></p> <ul style="list-style-type: none"> <li>- If the recruitment of the study population is based on a convenient/ self-reported sampling OR if response is &lt;10% or not reported, the study will be excluded from analysis.</li> </ul> | low  | <ul style="list-style-type: none"> <li><input type="checkbox"/> Case selection and recruitment was acceptable.#</li> <li><input type="checkbox"/> Control subjects' selection and recruitment was acceptable.#</li> <li><input type="checkbox"/> Non-response was less than 50% for cases and/or control subjects OR it was &gt;50% and &lt;70%, but substantial differential selection of cases and control subjects could be excluded*</li> </ul>                                                                            |              |
|                                                                                                                                                                                                                                                                                                                                                                                                                                                                                                                                                                                                                                                                                                                                                                                                                                                                                                                                                                                                      | high | <ul style="list-style-type: none"> <li><input type="checkbox"/> Case selection and recruitment was not acceptable.#</li> <li><input type="checkbox"/> Control subjects' selection and recruitment was not acceptable.#</li> <li><input type="checkbox"/> Non-response was &gt;70% for cases or control subjects OR it was &gt;50% and &lt;70%, but substantial differential selection of cases and control subjects could not be excluded.*</li> <li><input type="checkbox"/> Response not reported/ not calculable</li> </ul> |              |

\*according to Ijaz et al. (2013), with modifications; # SIGN/CASP § Shamliyan

| Major risk of bias domains*                                                                                                                                                                                                                                                                                                                                                                                                                                                                                                                                                                                                                                                               | Risk    | Criteria                                                                                                                                                                                                                                                                                                                                                                                                                                                 | Hints/ notes |
|-------------------------------------------------------------------------------------------------------------------------------------------------------------------------------------------------------------------------------------------------------------------------------------------------------------------------------------------------------------------------------------------------------------------------------------------------------------------------------------------------------------------------------------------------------------------------------------------------------------------------------------------------------------------------------------------|---------|----------------------------------------------------------------------------------------------------------------------------------------------------------------------------------------------------------------------------------------------------------------------------------------------------------------------------------------------------------------------------------------------------------------------------------------------------------|--------------|
| <b>For cross-sectional studies</b><br><i>HINT: We are looking for selection bias:</i> <ul style="list-style-type: none"> <li>- Was the study population representative of a defined population? #</li> <li>- Was everybody included who should have been included? #</li> <li>- If response rate is slightly &lt;50% but does not indicate selection bias, it will be listed as a demerit in extraction table.</li> </ul> <i>PRELIMINARY RULING:</i> <ul style="list-style-type: none"> <li>- If the recruitment of the study population is based on a convenient/ self-reported sampling OR if response is &lt;10% or not reported, the study will be excluded from analysis.</li> </ul> | low     | <input type="checkbox"/> Recruitment of the study population was acceptable.#<br><input type="checkbox"/> Non-response was less than 50% OR it was >50% and <70%, but substantial differential selection of the study population could be excluded.*                                                                                                                                                                                                     |              |
|                                                                                                                                                                                                                                                                                                                                                                                                                                                                                                                                                                                                                                                                                           | high    | <input type="checkbox"/> Recruitment of the study population was not acceptable.#<br><input type="checkbox"/> Non-response was >70% OR it was >50% and <70%, but substantial differential selection of the study population could not be excluded.*<br><input type="checkbox"/> Response not reported/ not calculable.                                                                                                                                   |              |
| <b>2. Exposure definition and measurement</b>                                                                                                                                                                                                                                                                                                                                                                                                                                                                                                                                                                                                                                             | low     | <input type="checkbox"/> Exposure was defined adequately covering more than one aspect of exposure (duration, frequency, intensity) and was assessed objectively: direct measurement or systematic observations or using a questionnaire that is validated.*                                                                                                                                                                                             |              |
|                                                                                                                                                                                                                                                                                                                                                                                                                                                                                                                                                                                                                                                                                           | high    | <input type="checkbox"/> Exposure was not defined adequately covering only one aspect of exposure (duration, frequency, intensity) and/or was assessed subjectively (self-report, questionnaire, interview) or using a proxy used to allocate exposure status (job matrix, job title).*<br><input type="checkbox"/> Different methods were used to measure exposure in different groups/ cases and control subjects ( <i>in case-control studies</i> ).§ |              |
|                                                                                                                                                                                                                                                                                                                                                                                                                                                                                                                                                                                                                                                                                           | unclear | <input type="checkbox"/> Not reported.                                                                                                                                                                                                                                                                                                                                                                                                                   |              |
| <b>3. Outcome “rate of/ risk to develop meniscal lesions”. Source and validation</b>                                                                                                                                                                                                                                                                                                                                                                                                                                                                                                                                                                                                      | low     | <input type="checkbox"/> Outcome was accurately/ objectively measured to minimize bias (e.g. arthroscopically, MRI, open surgery)#<br><input type="checkbox"/> Measurement methods were similar in the different groups.#                                                                                                                                                                                                                                |              |
|                                                                                                                                                                                                                                                                                                                                                                                                                                                                                                                                                                                                                                                                                           | high    | <input type="checkbox"/> Outcome was not accurately or subjectively measured (self-reported, clinical examination).#<br><input type="checkbox"/> Measurement methods were different in the groups.#                                                                                                                                                                                                                                                      |              |
|                                                                                                                                                                                                                                                                                                                                                                                                                                                                                                                                                                                                                                                                                           | unclear | <input type="checkbox"/> Not reported.                                                                                                                                                                                                                                                                                                                                                                                                                   |              |
| <b>4. Confounding and effect modification</b>                                                                                                                                                                                                                                                                                                                                                                                                                                                                                                                                                                                                                                             | low     | <input type="checkbox"/> If risk estimators were calculated, major confounding factors (age, sex) were considered.<br><input type="checkbox"/> If only prevalence or incidence was assessed, at least sex and age are described.                                                                                                                                                                                                                         |              |
|                                                                                                                                                                                                                                                                                                                                                                                                                                                                                                                                                                                                                                                                                           | high    | <input type="checkbox"/> Major confounding factors (age, sex) were not considered.                                                                                                                                                                                                                                                                                                                                                                       |              |
|                                                                                                                                                                                                                                                                                                                                                                                                                                                                                                                                                                                                                                                                                           | unclear | <input type="checkbox"/> Not reported.                                                                                                                                                                                                                                                                                                                                                                                                                   |              |

| Major risk of bias domains*                                         | Risk    | Criteria                                                                                                                                                                                                                                                                                                                                       | Hints/ notes |
|---------------------------------------------------------------------|---------|------------------------------------------------------------------------------------------------------------------------------------------------------------------------------------------------------------------------------------------------------------------------------------------------------------------------------------------------|--------------|
| <b>5. Analysis method: methods to reduce research specific bias</b> | low     | <input type="checkbox"/> Authors used adequate statistical models to reduce bias (e.g. standardization, matching, adjustment in multivariate model, stratification, propensity scoring). <sup>§</sup>                                                                                                                                          |              |
|                                                                     | high    | <input type="checkbox"/> Authors did not use adequate statistical models to reduce bias.                                                                                                                                                                                                                                                       |              |
|                                                                     | unclear | <input type="checkbox"/> Not reported.                                                                                                                                                                                                                                                                                                         |              |
| <b>6. Chronology</b>                                                | low     | <input type="checkbox"/> Incident diseases were included. <sup>#</sup><br><input type="checkbox"/> Temporal relation may be established (exposure precedes the outcome). <sup>#</sup><br><input type="checkbox"/> No meniscal damage known at baseline ( <b><i>in cohort and case-control-studies</i></b> ).                                   |              |
|                                                                     | high    | <input type="checkbox"/> People with prevalent meniscal damage were included OR people with prevalent meniscal damage of baseline were not excluded ( <b><i>in cohort studies</i></b> ). <sup>#</sup><br><input type="checkbox"/> Temporal relation cannot be established.<br><input type="checkbox"/> Meniscal status is unknown at baseline. |              |
|                                                                     | unclear | <input type="checkbox"/> Not reported.                                                                                                                                                                                                                                                                                                         |              |

| Minor risk of bias domains*     | Risk    | Criteria                                                                                                                                                                                                                 | Hints/ notes |
|---------------------------------|---------|--------------------------------------------------------------------------------------------------------------------------------------------------------------------------------------------------------------------------|--------------|
| <b>7. Blinding of assessors</b> | low     | <input type="checkbox"/> Assessors were reported or indicated to be blind for individual exposure-status in cohort and cross-sectional studies and to case status in case-control and cross-sectional studies            |              |
|                                 | high    | <input type="checkbox"/> Assessors were reported or indicated <u>not</u> to be blind for individual exposure-status in cohort and cross-sectional studies and to case status in case-control and cross-sectional studies |              |
|                                 | unclear | <input type="checkbox"/> Not reported.                                                                                                                                                                                   |              |
| <b>8. Funding</b>               | low     | <input type="checkbox"/> Grant/ non-profit-organizations*<br><input type="checkbox"/> Study was clearly not affected by sponsors.*                                                                                       |              |
|                                 | high    | <input type="checkbox"/> Sponsoring organization participated in data analysis.<br><input type="checkbox"/> Study was probably affected by sponsors.                                                                     |              |
|                                 | unclear | <input type="checkbox"/> Industry, combined industry+grant*, unclear if study was affected by sponsors.<br><input type="checkbox"/> Not reported.                                                                        |              |
| <b>9. Conflict of interest</b>  | low     | <input type="checkbox"/> Reported not having conflict of interest or clear from report/ communication that study was not affected by author(s) affiliation.*                                                             |              |
|                                 | high    | <input type="checkbox"/> Conflict of interest exists (at least one author).*                                                                                                                                             |              |
|                                 | unclear | <input type="checkbox"/> Not reported.                                                                                                                                                                                   |              |

| Overall risk of bias assessment                                                                                                        |                                                                               | Low Risk                   | High Risk | Unclear Risk |
|----------------------------------------------------------------------------------------------------------------------------------------|-------------------------------------------------------------------------------|----------------------------|-----------|--------------|
| Major domains                                                                                                                          | 1. Recruitment procedure & follow-up (in cohort studies)                      |                            |           |              |
|                                                                                                                                        | 2. Exposure definition and measurement                                        |                            |           |              |
|                                                                                                                                        | 3. Outcome “rate of/ risk to develop meniscal lesions”. Source and validation |                            |           |              |
|                                                                                                                                        | 4. Confounding and effect modification                                        |                            |           |              |
|                                                                                                                                        | 5. Analysis method: methods to reduce research specific bias                  |                            |           |              |
|                                                                                                                                        | 6. Chronology                                                                 |                            |           |              |
| Minor domains                                                                                                                          | 7. Blinding of assessors                                                      |                            |           |              |
|                                                                                                                                        | 8. Funding                                                                    |                            |           |              |
|                                                                                                                                        | 9. Conflict of interest                                                       |                            |           |              |
| <b>General rule for rating:</b><br><b>Low risk of bias:</b> low risk in all major domains<br><b>High risk of bias:</b> if not low risk |                                                                               | <b>Overall assessment:</b> |           |              |
